# Supplementary material for: In vivo performance of gold nanoparticle-loaded absorbable inferior vena cava filters in a swine model
Source: Royal Society of Chemistry journal article supplement (doi:10.1039/d0bm00414f), 2020-01-01
Supplement: d0bm00414f1.pdf [file d0bm00414f1.pdf]

## Supplementary Information

### ***In vivo* performance of gold nanoparticle-loaded absorbable inferior vena cava filters in a swine model**

Steven Y. Huang,<sup>†a</sup> Jossana A. Damasco,<sup>†a</sup> Li Tian,<sup>a</sup> Linfeng Lu,<sup>‡a</sup> Joy Vanessa D. Perez,<sup>a,g</sup> Katherine A. Dixon,<sup>a</sup> Malea L. Williams,<sup>a</sup> Megan C. Jacobsen,<sup>b</sup> Stephen Dria,<sup>e</sup> Mitchell D. Eggers,<sup>e</sup> Adam D. Melancon,<sup>c</sup> Rick R. Layman,<sup>b</sup> Elizabeth M. Whitley<sup>d</sup> and Marites P. Melancon<sup>\*a,f</sup>

<sup>a</sup> Department of Interventional Radiology, The University of Texas MD Anderson Cancer Center, 1515 Holcombe Blvd., Houston, TX 77030.

<sup>b</sup> Department of Imaging Physics, The University of Texas MD Anderson Cancer Center, 1515 Holcombe Blvd., Houston, TX 77030.

<sup>c</sup> Department of Radiation Physics, The University of Texas MD Anderson Cancer Center, 1515 Holcombe Blvd., Houston, TX 77030.

<sup>d</sup> Department of Veterinary Medicine and Surgery, The University of Texas MD Anderson Cancer Center, 1515 Holcombe Blvd., Houston, TX 77030.

<sup>e</sup> Adient Medical, Inc., 12234 Shadow Creek Parkway, Building 8, Suite 106, Pearland, TX 77584.

<sup>f</sup> MD Anderson Cancer Center UT Health Graduate School of Biomedical Sciences, 6767 Bertner Ave., Houston, TX 77030

<sup>g</sup> College of Medicine, University of the Philippines, Manila, Philippines 1000.

<sup>†</sup> These authors contributed equally.

<sup>‡</sup> Present Address: Baylor College of Medicine, Houston, TX 77030

\* Corresponding Author: [mmelancon@mdanderson.org](mailto:mmelancon@mdanderson.org)

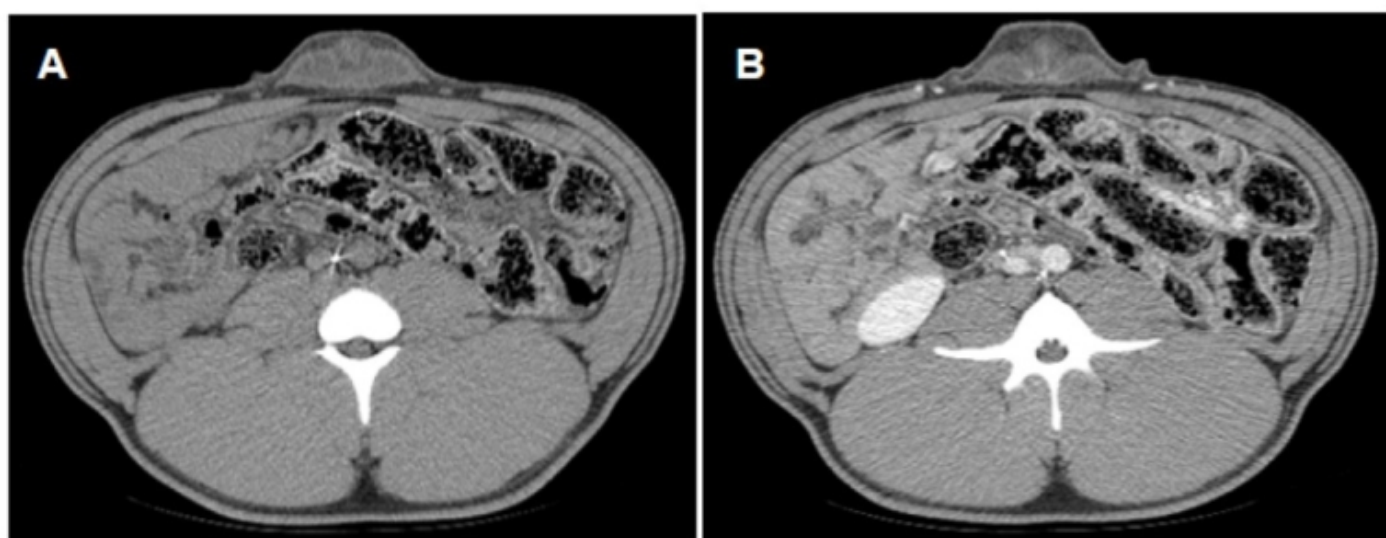

**Figure S1.** Axial CT images of PPDO IVCF in 1 pig using the Siemens SOMATOM Definition Edge (A) Imaging without iodine contrast. (B) Imaging with iodine contrast.

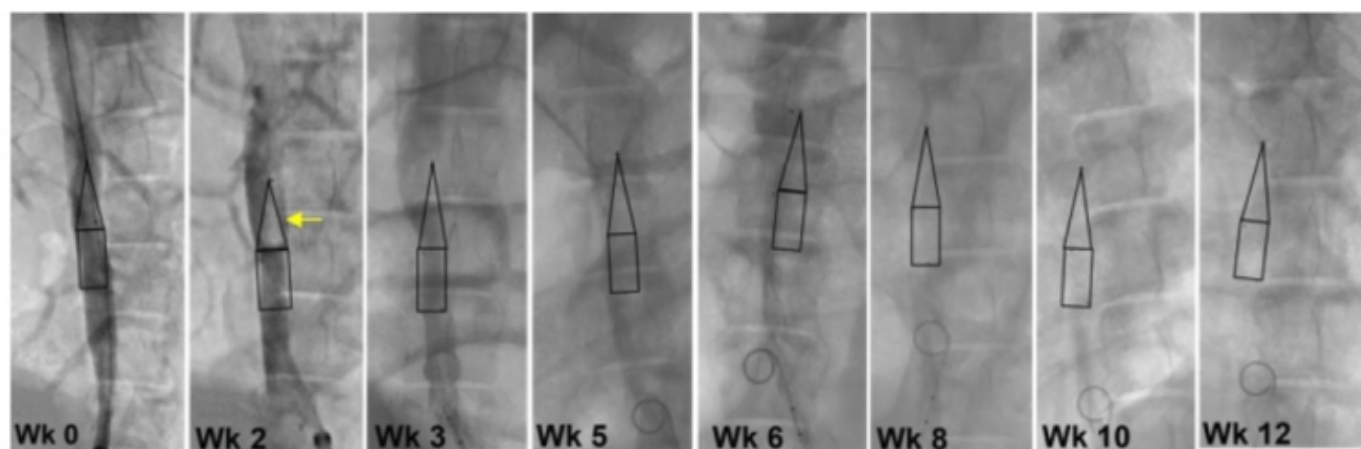

**Figure S2.** Fluoroscopic images from filter deployment to week 12. A thrombus was deployed at week 2 and had already disappeared by week 3. No evidence of PE was observed at the immediate follow-up CT examination.

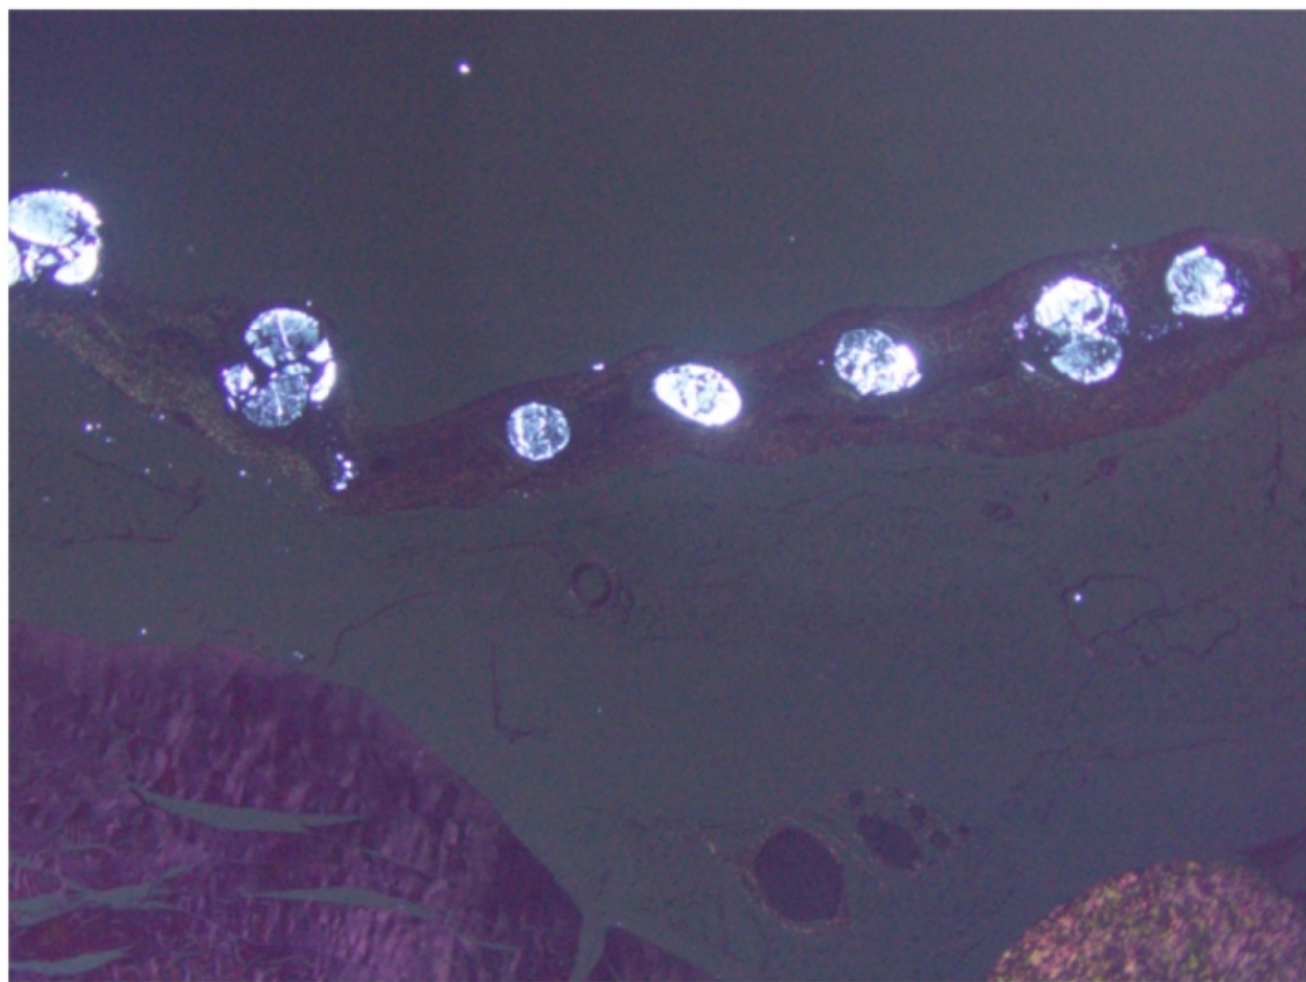

**Figure S3.** PPDO fragments within the caval wall, as confirmed by passing the slide under polarized light.



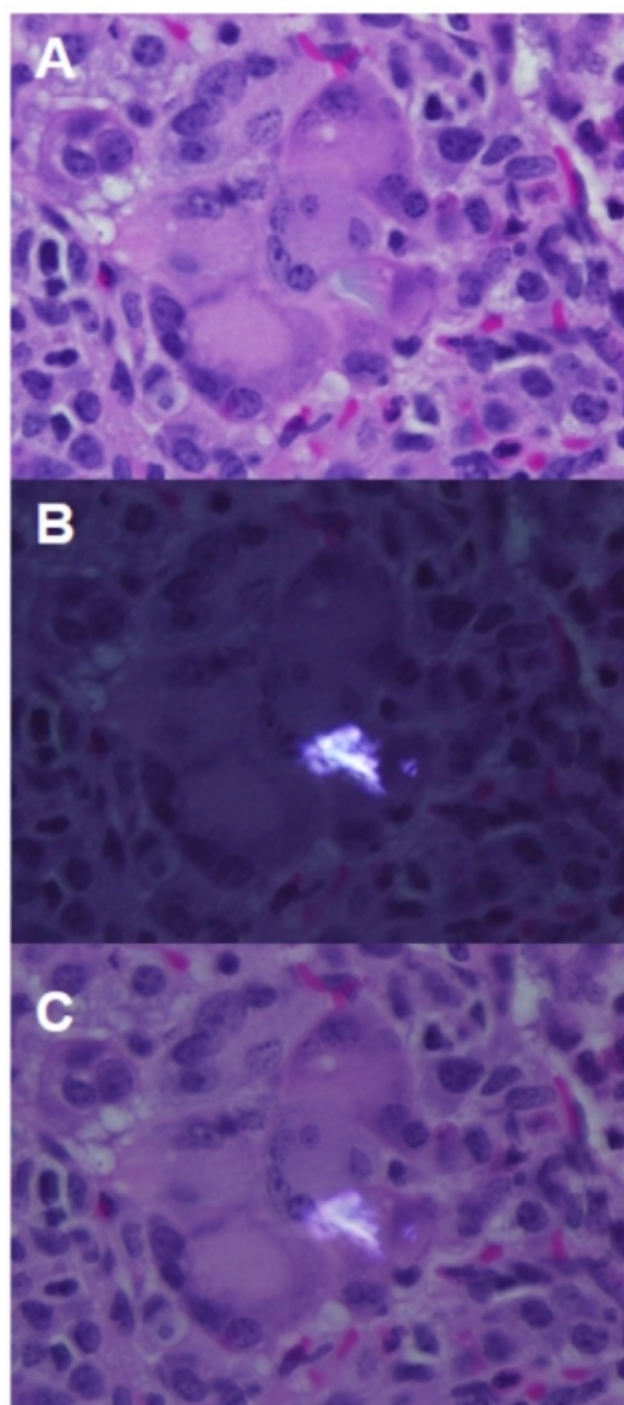

**Figure S4.** PPDO fragments in the lung tissue. (A) H&E staining of the lung tissue showing a multinucleated giant cell with embedded filter fragment. (B) Confirmation of the PPDO under with polarized light. (C) Overlay of images A and B.

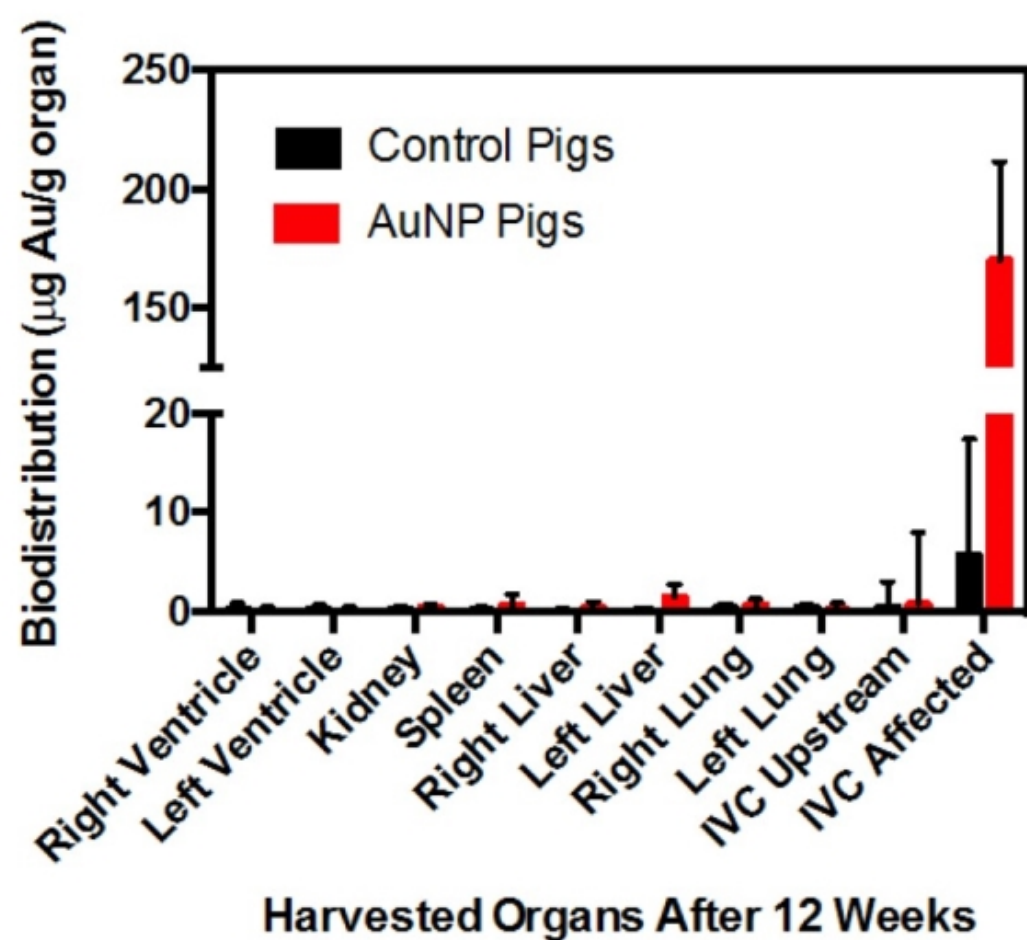

**Figure S5.** Au Biodistribution in harvested organs after 12 weeks of IVCF implantation quantified via ICP-MS

Table S1. Serial Hematologic Parameters

Swine implanted with Control IVCF

| Parameter | Sodium (mEq/L) | Potassium (mEq/L) | Chloride (mEq/L) | Cr (mg/dL) | WBC (x10 <sup>9</sup> /uL) | Hgb (g/dL) | Platelets (x10 <sup>9</sup> /uL) | PT (sec)   | PTT (sec)   | AST (U/L)  | ALT (U/L)  | pH Level  | pCO <sub>2</sub> (mm Hg) | pO <sub>2</sub> (mm Hg) | SO <sub>2</sub> (%) |
|-----------|----------------|-------------------|------------------|------------|----------------------------|------------|----------------------------------|------------|-------------|------------|------------|-----------|--------------------------|-------------------------|---------------------|
| Baseline  | 136.9 ± 2.2    | 4.0 ± 0.2         | 99.4 ± 1.8       | 1.6 ± 0.3  | 16.1 ± 3.9                 | 11.1 ± 0.4 | 337.0 ± 19.9                     | 13.5 ± 0.2 | 28.1 ± 11.8 | 17.7 ± 2.7 | 27.0 ± 3.5 | 7.5 ± 0.0 | 48.6 ± 5.3               | 554.0 ± 41.9            | 100.0 ± 0.0         |
| Week 1    | 135.6 ± 4.3    | 4.1 ± 0.2         | 98.6 ± 2.9       | 1.6 ± 0.4  | 12.6 ± 3.1                 | 8.8 ± 0.7  | 362.7 ± 98.0                     | 13.8 ± 0.5 | 24.9 ± 8.6  | 20.0 ± 7.9 | 26.0 ± 7.5 | 7.3 ± 0.1 | 66.9 ± 3.4               | 494.7 ± 43.2            | 100.0 ± 0.0         |
| Week 3    | 137.9 ± 2.1    | 3.8 ± 0.1         | 100.4 ± 2.2      | 1.6 ± 0.3  | 13.9 ± 4.7                 | 9.1 ± 0.4  | 315.0 ± 28.2                     | 13.4 ± 0.6 | 25.9 ± 11.0 | 17.7 ± 3.0 | 24.7 ± 5.0 | 7.3 ± 0.0 | 70.5 ± 4.9               | 608.3 ± 23.7            | 100.0 ± 0.0         |
| Week 5    | 135.4 ± 6.3    | 3.8 ± 0.2         | 98.1 ± 4.8       | 1.6 ± 0.2  | 12.2 ± 4.1                 | 9.1 ± 0.3  | 333.0 ± 21.2                     | 13.5 ± 0.4 | 27.1 ± 10.0 | 21.3 ± 3.6 | 32.3 ± 2.3 | 7.3 ± 0.1 | 67.1 ± 9.7               | 566.3 ± 17.9            | 100.0 ± 0.0         |
| Week 6    | 136.4 ± 4.8    | 3.9 ± 0.1         | 97.5 ± 3.3       | 1.7 ± 0.2  | 11.1 ± 3.5                 | 9.4 ± 0.5  | 348.0 ± 10.6                     | 14.2 ± 0.4 | 38.0 ± 2.4  | 18.7 ± 1.8 | 31.7 ± 3.1 | 7.3 ± 0.0 | 69.3 ± 8.4               | 547.3 ± 42.8            | 100.0 ± 0.0         |
| Week 8    | 133.3 ± 4.8    | 3.7 ± 0.2         | 96.0 ± 5.0       | 1.7 ± 0.2  | 11.6 ± 2.5                 | 9.1 ± 0.4  | 319.7 ± 32.0                     | 13.5 ± 0.3 | 34.9 ± 4.9  | 19.3 ± 3.9 | 31.0 ± 3.5 | 7.3 ± 0.0 | 71.0 ± 3.8               | 572.3 ± 8.6             | 100.0 ± 0.0         |
| Week 10   | 131.6 ± 3.9    | 3.7 ± 0.1         | 94.9 ± 4.5       | 1.6 ± 0.2  | 10.8 ± 0.9                 | 9.2 ± 0.4  | 304.0 ± 24.3                     | 13.3 ± 0.3 | 41.8 ± 6.6  | 18.3 ± 2.5 | 31.7 ± 3.1 | 7.3 ± 0.0 | 70.7 ± 5.9               | 582.7 ± 14.2            | 100.0 ± 0.0         |
| Week 12   | 129.6 ± 1.7    | 3.8 ± 0.3         | 93.1 ± 0.1       | 1.7 ± 0.4  | 9.8 ± 1.8                  | 10.2 ± 0.2 | 259.0 ± 31.1                     | 13.4 ± 0.1 | 34.6 ± 4.5  | 18.5 ± 4.9 | 29.5 ± 0.7 | 7.4 ± 0.1 | 55.8 ± 9.3               | 588.5 ± 70.0            | 100.0 ± 0.0         |

Swine implanted with AuNP IVCF

| Parameter | Sodium (mEq/L) | Potassium (mEq/L) | Chloride (mEq/L) | Cr (mg/dL) | WBC (x10 <sup>9</sup> /uL) | Hgb (g/dL) | Platelets (x10 <sup>9</sup> /uL) | PT (sec)   | PTT (sec)   | AST (U/L)  | ALT (U/L)   | pH Level  | pCO <sub>2</sub> (mm Hg) | pO <sub>2</sub> (mm Hg) | SO <sub>2</sub> (%) |
|-----------|----------------|-------------------|------------------|------------|----------------------------|------------|----------------------------------|------------|-------------|------------|-------------|-----------|--------------------------|-------------------------|---------------------|
| Baseline  | 140.4 ± 0.9    | 4.4 ± 0.3         | 102.0 ± 0.7      | 1.3 ± 0.1  | 18.4 ± 3.9                 | 8.5 ± 0.6  | 570.7 ± 172.5                    | 13.0 ± 0.2 | 22.2 ± 13.2 | 14.0 ± 1.0 | 27.3 ± 5.5  | 7.5 ± 0.1 | 52.3 ± 8.8               | 556.0 ± 45.0            | 100.0 ± 0.0         |
| Week 1    | 136.6 ± 2.8    | 4.6 ± 0.1         | 97.1 ± 1.6       | 1.2 ± 0.1  | 17.4 ± 1.6                 | 7.7 ± 0.6  | 558.0 ± 156.7                    | 13.1 ± 0.4 | 33.2 ± 8.4  | 17.7 ± 6.7 | 32.7 ± 12.9 | 7.4 ± 0.1 | 66.5 ± 21.3              | 505.3 ± 64.3            | 100.0 ± 0.0         |
| Week 3    | 139.3 ± 1.5    | 4.4 ± 0.3         | 98.3 ± 2.0       | 1.5 ± 0.2  | 17.7 ± 4.2                 | 8.2 ± 1.4  | 658.0 ± 75.3                     | 12.7 ± 0.2 | 38.2 ± 9.7  | 17.7 ± 2.9 | 31.0 ± 7.5  | 7.6 ± 0.0 | 48.7 ± 2.4               | 551.3 ± 93.0            | 100.0 ± 0.0         |
| Week 5    | 139.9 ± 1.0    | 4.1 ± 0.4         | 99.2 ± 1.0       | 1.5 ± 0.2  | 16.0 ± 3.3                 | 9.4 ± 0.7  | 565.0 ± 95.4                     | 12.7 ± 0.3 | 38.5 ± 3.9  | 17.0 ± 2.6 | 37.0 ± 5.2  | 7.6 ± 0.0 | 42.8 ± 5.3               | 548.0 ± 79.2            | 100.0 ± 0.0         |
| Week 6    | 138.9 ± 1.3    | 4.0 ± 0.3         | 98.0 ± 1.0       | 1.6 ± 0.2  | 15.3 ± 2.1                 | 9.2 ± 0.7  | 569.0 ± 89.8                     | 13.0 ± 0.2 | 44.7 ± 5.5  | 15.3 ± 0.6 | 36.3 ± 3.1  | 7.5 ± 0.0 | 48.7 ± 1.5               | 561.3 ± 53.2            | 100.0 ± 0.0         |
| Week 8    | 140.0 ± 1.6    | 4.0 ± 0.2         | 99.5 ± 2.4       | 1.7 ± 0.0  | 14.1 ± 2.2                 | 9.5 ± 1.0  | 587.3 ± 106.0                    | 12.8 ± 0.1 | 51.6 ± 6.0  | 15.0 ± 1.0 | 34.0 ± 2.6  | 7.5 ± 0.0 | 47.9 ± 2.7               | 583.0 ± 9.5             | 100.0 ± 0.0         |
| Week 10   | 138.7 ± 1.9    | 4.1 ± 0.1         | 98.9 ± 1.3       | 1.8 ± 0.2  | 13.7 ± 2.6                 | 9.6 ± 1.0  | 578.0 ± 95.3                     | 12.5 ± 0.3 | 44.5 ± 9.5  | 16.0 ± 1.7 | 33.7 ± 4.5  | 7.6 ± 0.0 | 44.5 ± 1.5               | 561.0 ± 41.7            | 100.0 ± 0.0         |
| Week 12   | 137.7 ± 1.6    | 4.3 ± 0.0         | 99.7 ± 0.9       | 1.9 ± 0.2  | 13.1 ± 3.2                 | 9.2 ± 1.0  | 551.0 ± 61.9                     | 12.8 ± 0.2 | 42.2 ± 9.2  | 16.7 ± 3.1 | 30.7 ± 4.2  | 7.5 ± 0.1 | 51.4 ± 9.4               | 577.7 ± 27.8            | 100.0 ± 0.0         |

Note.– Cr = creatinine, WBC = white blood cell, Hgb = hemoglobin, PT = prothrombin time, PTT = partial thromboplastin time, AST = aspartate aminotransferase, ALT = alanine aminotransferase, pCO<sub>2</sub> = partial pressure of carbon dioxide, pO<sub>2</sub> = partial pressure of oxygen, SO<sub>2</sub> = saturation of oxygen in arterial blood
